# Supplementary material for: Key performance indicators of COVID-19 contact tracing in Belgium from September 2020 to December 2021
Source: PubMed Central journal article supplement (PMC10588862; doi:10.1371/journal.pone.0292346), 2023-10-20
Supplement: pone.0292346.s006.pdf [file pone.0292346.s006.pdf]

**S1 Table. Index case characteristics.** Proportion of all index cases by province and age group.

|                                | <b>0-17y</b> | <b>18-29y</b> | <b>30-39y</b> | <b>40-49y</b> | <b>50-64y</b> | <b>+65y</b> | <b>Unknown</b> |
|--------------------------------|--------------|---------------|---------------|---------------|---------------|-------------|----------------|
| <b>Antwerp</b>                 | 0.052        | 0.040         | 0.038         | 0.034         | 0.038         | 0.023       | 0.000          |
| <b>Brussels Capital Region</b> | 0.053        | 0.047         | 0.045         | 0.040         | 0.037         | 0.020       | 0.000          |
| <b>East Flanders</b>           | 0.042        | 0.032         | 0.031         | 0.030         | 0.033         | 0.024       | 0.000          |
| <b>Flemish Brabant</b>         | 0.013        | 0.009         | 0.008         | 0.008         | 0.008         | 0.005       | 0.000          |
| <b>Limburg</b>                 | 0.022        | 0.016         | 0.016         | 0.016         | 0.019         | 0.012       | 0.000          |
| <b>West Flanders</b>           | 0.032        | 0.024         | 0.023         | 0.022         | 0.028         | 0.022       | 0.000          |
| <b>Unknown</b>                 | 0.004        | 0.009         | 0.008         | 0.006         | 0.006         | 0.003       | 0.001          |
